# Supplementary material for: Population-wide gene disruption in the murine lung epithelium via AAV-mediated delivery of CRISPR-Cas9 components
Source: PubMed Central journal article supplement — Mol Ther Methods Clin Dev. 2022 Nov 1;27:431–49. doi: 10.1016/j.omtm.2022.10.016 (PMC9668740; doi:10.1016/j.omtm.2022.10.016), 2022-11-01
Supplement: mmc1.pdf [file mmc1.pdf]

**OMTM, Volume 27**

**Supplemental information**

**Population-wide gene disruption in the murine  
lung epithelium via AAV-mediated  
delivery of CRISPR-Cas9 components**

**Honglin Chen, Steffen Durinck, Hetal Patel, Oded Foreman, Kathryn Mesh, Jeffrey Eastham, Roger Caothien, Robert J. Newman, Merone Roose-Girma, Spyros Darmanis, Soren Warming, Annalisa Lattanzi, Yuxin Liang, and Benjamin Haley**



**Figure S1. Evaluation of delivery methods and transduction efficiency of AAV6, 8 and 9 in murine lung.**

**A.** Comparison of i.t. and i.n. delivery methods. AAV9 -CAG -luciferase virus at  $1 \times 10^{11}$  vg/mouse was delivered by either method. *In vivo* bioluminescent images were taken at week 1 post-delivery. Bioluminescent signal was detected at the lung area post i.t. delivery. **B.** Representative images of lung post i.t. delivery of 4% trypan blue dye in 50ul PBS. Pictures of lungs were taken immediately after delivery. **C.** Spatial distribution of AAV transduced cells in the lung. Animals were delivered with AAV9-CAG-GFP at  $2 \times 10^{11}$  vg/mouse by i.t. method. 3D imaging of the lung lobe was done at week 8 post virus delivery using a Leica Sp8 confocal microscope. The laser can detect GFP signals from surface to 2mm under the surface. GFP expression was observed throughout alveolar space as well as airways. **D.** *in vivo* bioluminescent images of mice delivered with AAV-CAG-luciferase at  $1 \times 10^{11}$  vg/mouse (upper panel). Male mice in the AAV9-CAG-luciferase group showed stronger bioluminescent signals at the abdomen area (indicated by the arrow). Quantification of the full body bioluminescent signal of each mouse (lower panel). **E.** Representative IF images of lung tissue sections stained with GFP and cell markers. Animals were sacrificed at week1 post AAV-CAG-GFP ( $1 \times 10^{11}$  vg) delivery. Scale bars indicate  $200 \mu\text{m}$  (AECII) and  $100 \mu\text{m}$  (Club cells), respectively. **F.** Quantification of IF images as represented in **E.** %GFP was quantified in AECII and club cells, respectively.  $n=7$ . Data was obtained from two lung lobes per sample. Error bars represent SEM.

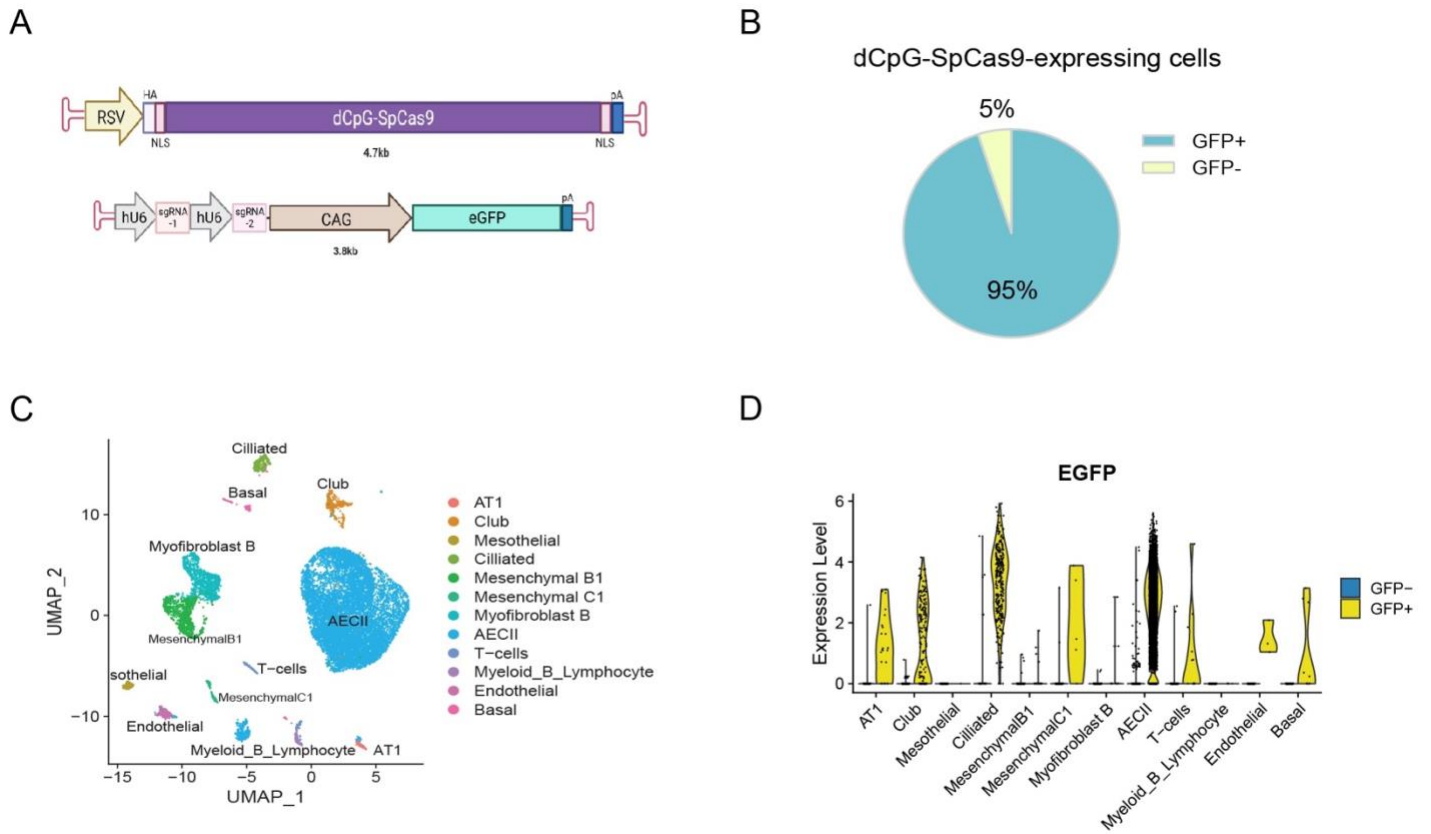

**Figure S2. scRNA-seq analysis of AAV transduced cell types.**

**A.** The diagram of AAV vectors used in this study. The dCpG-SpCas9 sequence was modified from SpCas9 with CpG islands replaced with non-CG dinucleotides. **B.** The pie chart shows the percentage of dCpG-SpCas9-expressing single cells that co-expressed GFP. **C.** UMAP clusters showing the overall cell types identified by scRNA-seq. **D.** The comparison of GFP expression levels in GFP- vs GFP+ samples as presented by the violin plot.

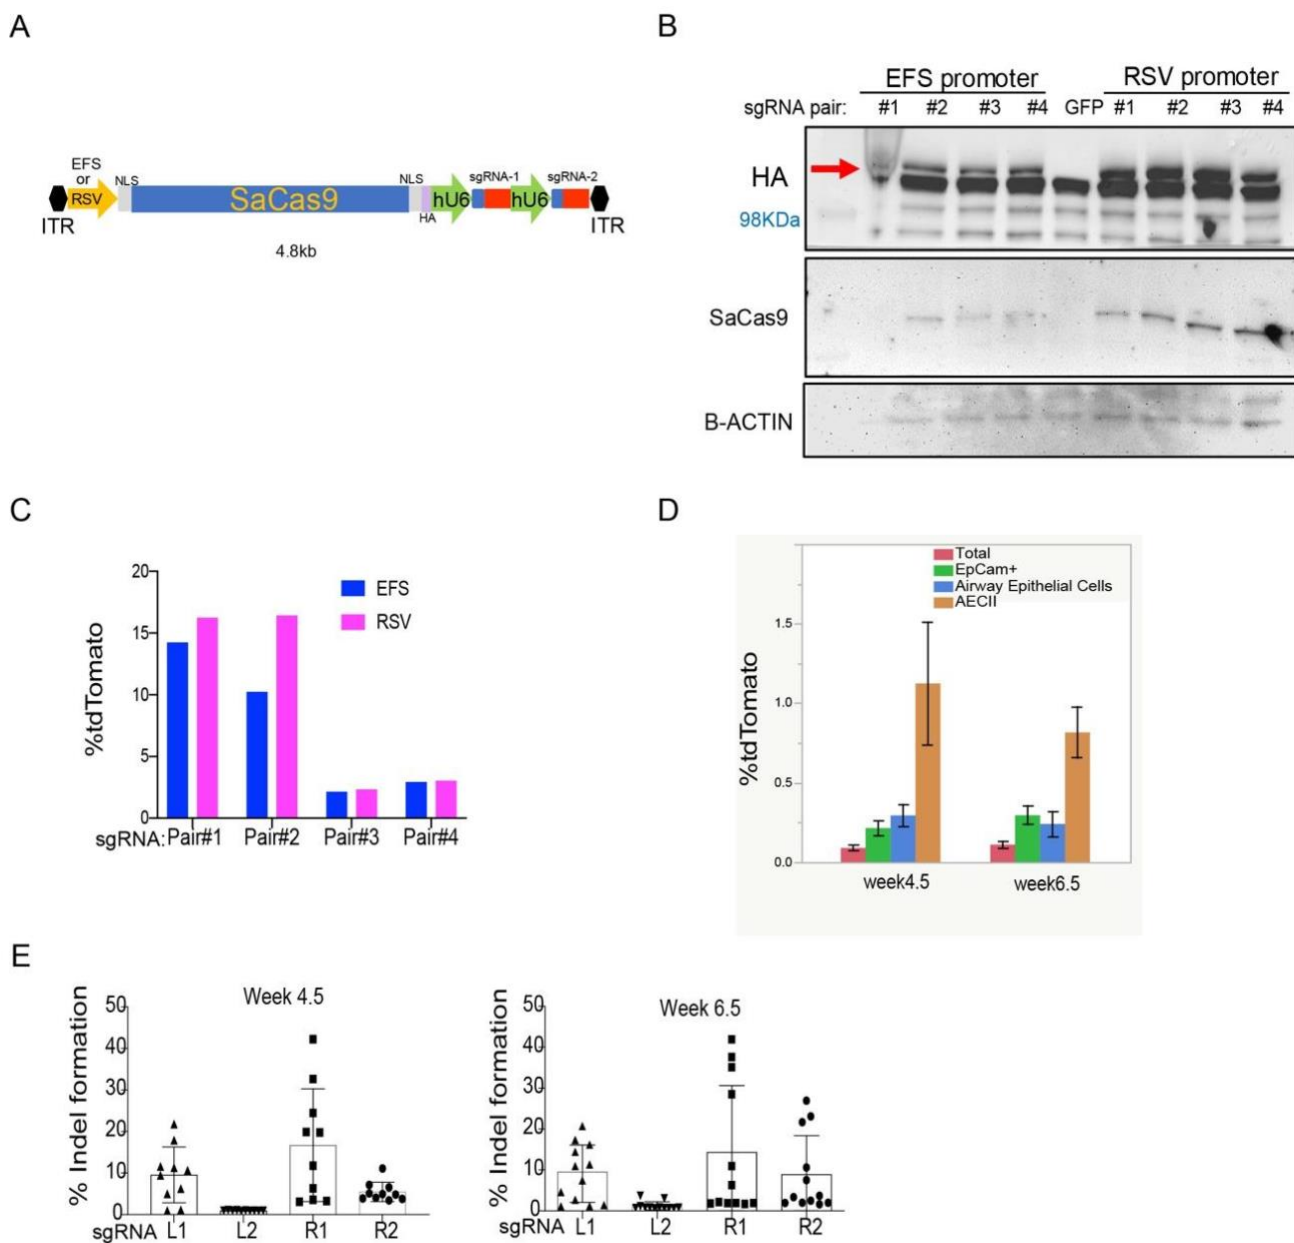

**Figure S3. AAV delivery of SaCas9 CRISPR system to Rosa26-LSL-tdTomato mice.**

**A.** The diagram of the pX601-all-in-one vector used in this study. **B.** Comparison of the two small promoters driving the SaCas9 expression. SaCas9 was tagged with HA. The constructs were nucleofected into the Rosa26-LSL-tdTomato MEFs cells. Proteins were extracted at day3 post nucleofection and subjected to Western blot analysis of the HA and SaCas9 expression. The red arrow indicated the HA band. **C.** tdTomato expression as a consequence of CRISPR/SaCas9-mediated deletion of the LSL cassette *in vitro*. The AAV constructs were nucleofected into the Rosa26-LSL-tdTomato MEFs cells and tdTomato expression was quantified by FACS at day7 post nucleofection. **D.** tdTomato expression as a consequence of CRISPR/SaCas9-mediated deletion of the LSL cassette *in vivo*. Three rounds of AAV were delivered to Rosa26-LSL-tdTomato mice with 7 days apart for each delivery. Animals were taken down at week 4.5 and week 6.5 post the 1<sup>st</sup> round of AAV delivery. The means of %tdTomato expression in different cell populations were shown. EpCam indicated the total lung epithelia; EpCam/B4 indicated distal airway epithelia; EpCam/SPC indicated AECII. The error bar stands for SEM (n=10 per timepoint). **E.** NGS analysis of the % indel formation at the CRISPR/SaCas9 on-target sites. DNA was

extracted from the sorted AECII cells at week 4.5 and 6.5 timepoints. Each dot represents one animal in the scatter plots.

A

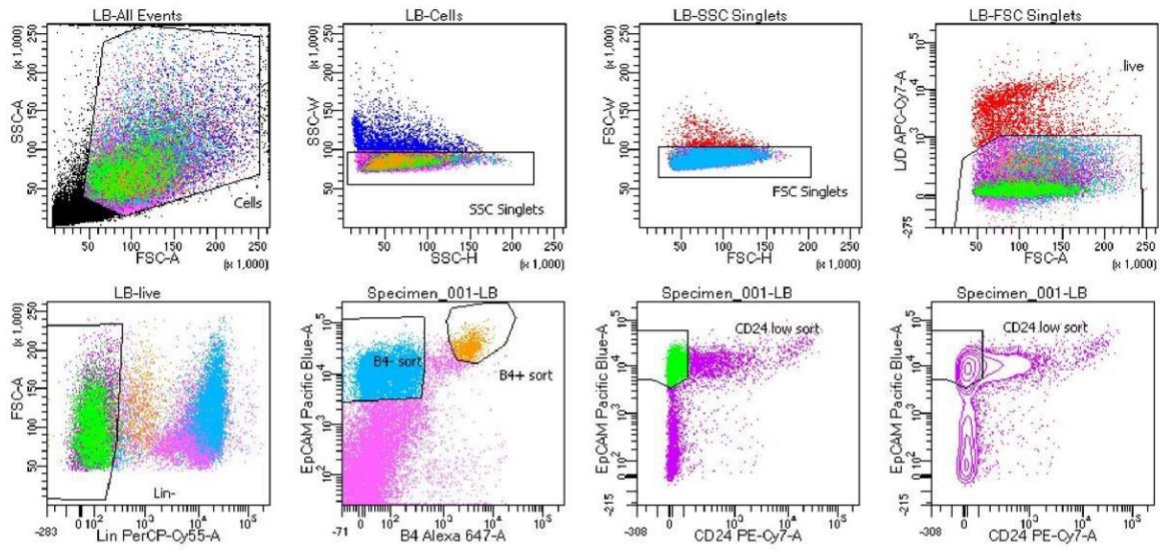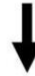

B

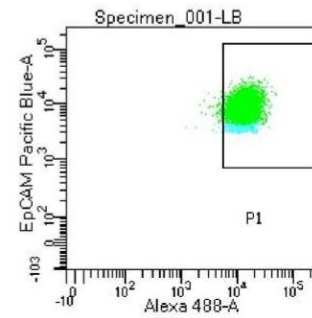

**Figure S4. FACS gating schema to analyze and sort out AECII and distal airway epithelial cells.**

**A.** Dissociated lung cells were stained with following markers: EpCam for epithelial marker; the AECII lineage markers including CD31, TER-119, CD11b, CD45 that termed as Lin, as well as the CD24 marker; the distal airway epithelial marker integrin  $\beta$ 4. The FACS gating set-ups for sorting of AECII (EpCam<sup>+</sup>/Lin<sup>-</sup>/CD24<sup>+</sup>) and distal airway epithelial (EpCam<sup>+</sup>/ integrin  $\beta$ 4<sup>+</sup>) cell populations were shown. **B.** The sorted AECII population from A was permeabilized and stained with SPC (an AECII cell specific marker) antibody conjugated with Alexa-488. 98% of the population was stained positive for the SPC marker, indicating the highly enrichment of AECII in the sorted population.

A

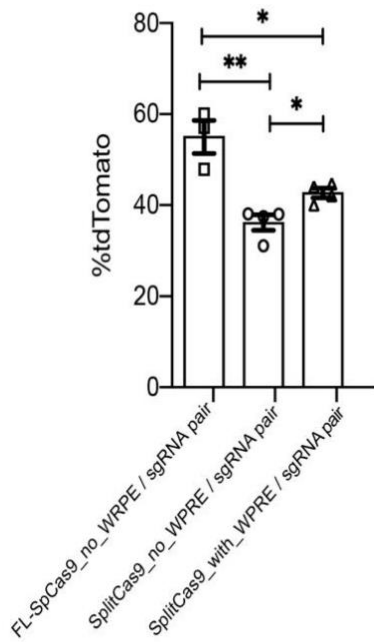

B

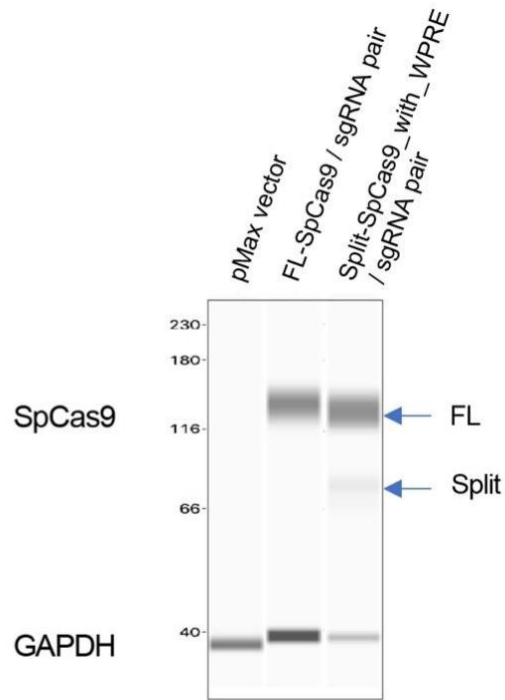

C

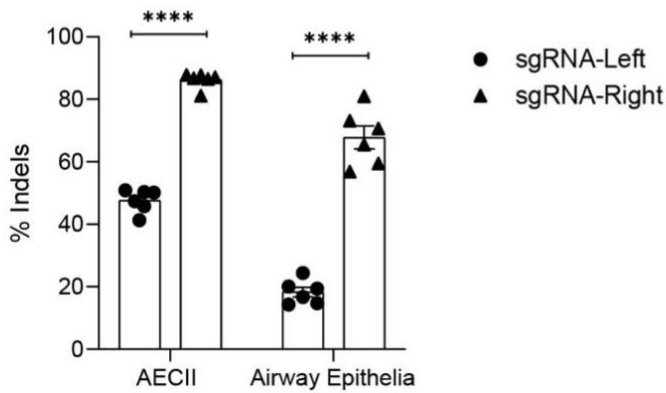

**Figure S5. *In vitro* assessment of AAV vector configuration#1 vs #2 in Rosa26-LSL-tdTomato MEFs.**

**A.** FACS analysis of %tdTomato expression as a consequence of CRISPR/SpCas9-mediated LSL cassette deletion in MEFs at day 4 post nucleofection of dual plasmids containing the CRISPR/SpCas9 components in configuration#1 (FL-SpCas9/sgRNA pair#2) or configuration#2 (Split-Cas9/sgRNA pair#2). Each dot represented the outcome from one experiment. Error bars represent SEM. \* and \*\* denote a p-value <0.05 and <0.001, respectively. **B.** Capillary protein analysis of SpCas9 expression in MEFs. Protein lysates were extracted from MEFs at day 4 post nucleofection of dual plasmids containing the CRISPR/SpCas9 components in configuration#1 (FL-SpCas9/sgRNA pair#2) or configuration#2 (Split-Cas9/sgRNA pair#2). **C.** Indel analysis of sgRNA pair#1 in animals received one dose of AAV-SpCas9/sgRNA pair. %Indels formation at the two on-target sites was examined in the sorted AECII and airway epithelial cells at week 3 post-intubation of AAV at 2e12 vg/mouse (n=5-6). Each dot represents one animal. Error bar represents SEM. \*\*\*\* Denotes a p-value <0.0001.



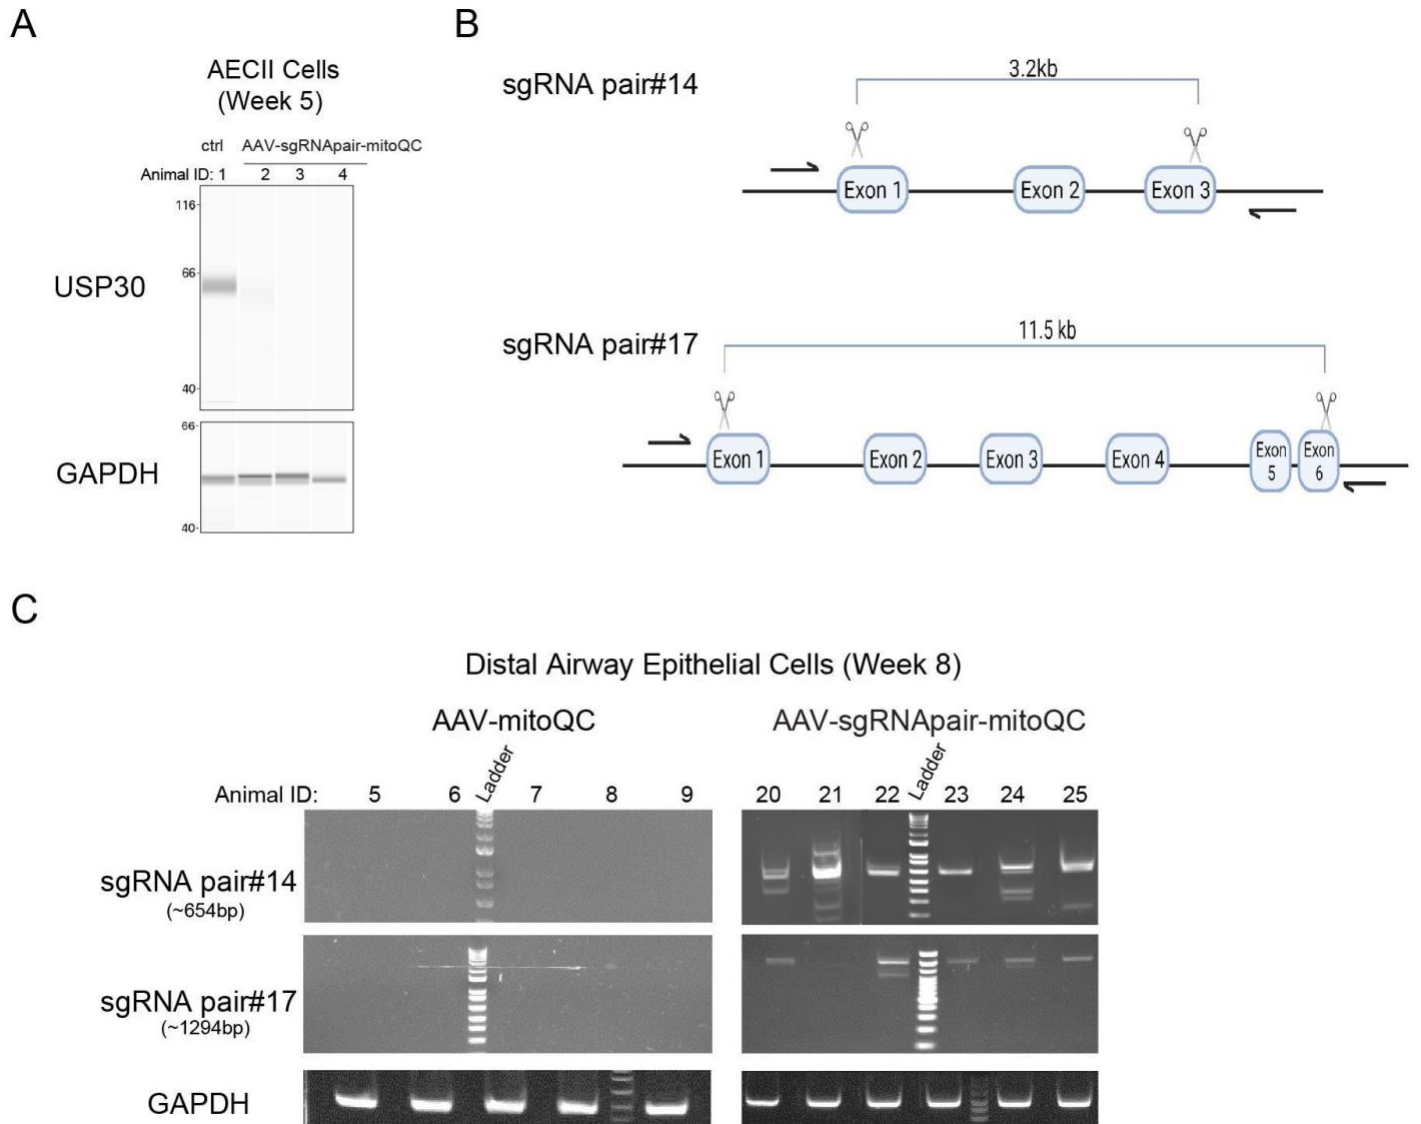

**Figure S6. Analysis of USP30 protein level and genomic fragment deletion at *Usp30* locus.**  
**A.** USP30 protein down-regulation in sorted AECII at week 5 post 1<sup>st</sup> round of AAV delivery. GAPDH served as the housekeeping control. The digital images of the capillary electrophoresis immunoblotting of USP30 and GAPDH were shown. **B.** PCR primer design to detect the deletion of USP30 exons by sgRNA pair#14 and 17. Arrows indicated where the primers were bound. The expected sizes of the PCR amplicons of the deleted genome were ~654bp and ~1294bp for sgRNA pair#14 and sgRNA pair#17, respectively. **C.** Representative gel images of PCR amplification of DNA extracted from sorted distal airway epithelial cells using primers shown in B. No PCR amplification was observed in the control group; PCR amplification was observed in the treatment group receiving either AAV-sgRNA pair#14 or AAV-sgRNA pair#17, indicating successful exon deletions in sorted airway epithelial cells. The TrackIt 100bp DNA ladder was used.

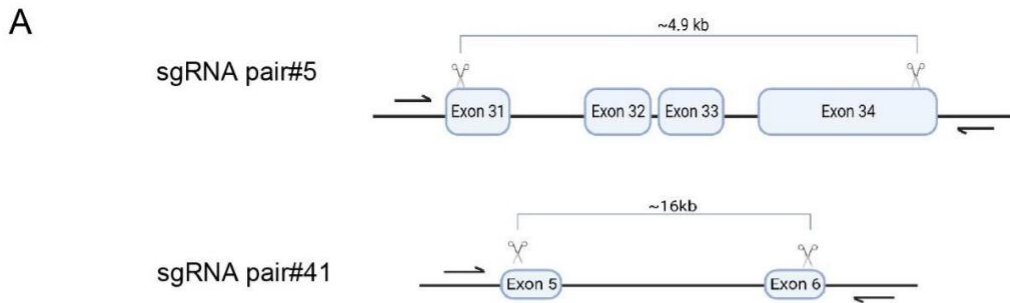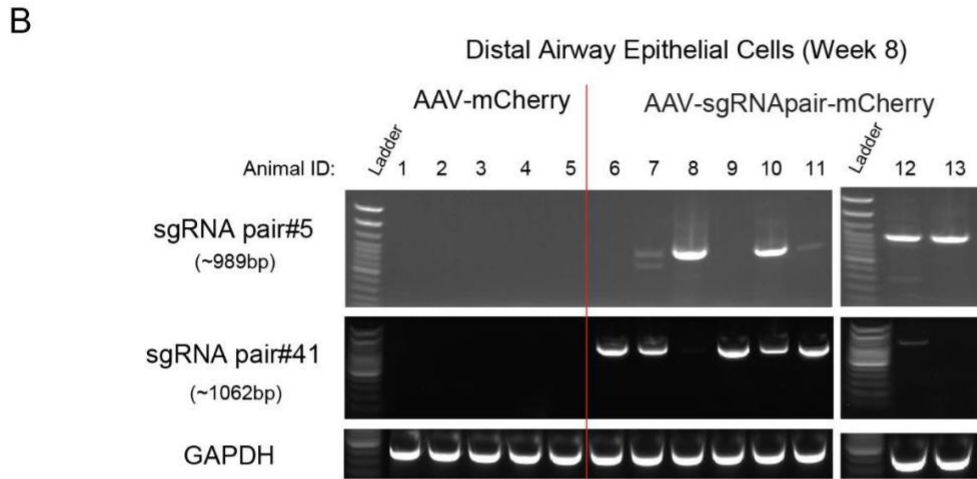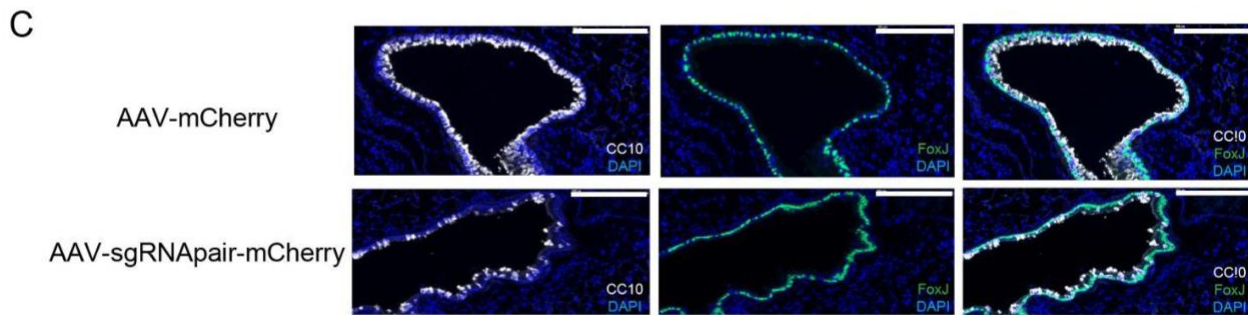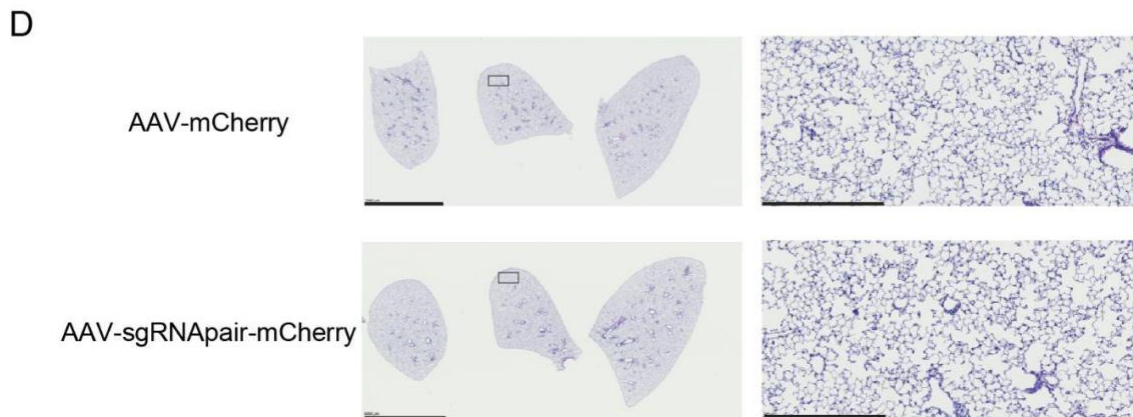

**Figure S7. Effect of CRISPR/SpCas9-mediated NOTCH2 down-regulation.**

**A.** PCR primer design to detect the deletion of Notch2 exons by sgRNA pair#5 and 41. Arrows indicated where the primers were bound. The expected sizes of the PCR amplicons of the deleted genome were ~989bp and ~1062bp for sgRNA pair#5 and sgRNA pair#41, respectively. **B.** Representative gel images of PCR amplification of DNA extracted from sorted distal airway epithelial cells using primers shown in B. No PCR amplification was observed in the control group; PCR amplification was observed in the treatment group receiving either AAV-sgRNA pair#5 or AAV-sgRNA pair#41, indicating successful exon deletions in sorted airway epithelial cells. The TrackIt 100bp DNA ladder was used. **C.** Representative IF images of club and ciliated cells at week 8 timepoint. Club cells stained in white color (CC10: a cell marker for club cells); ciliated cells stained in green color (FoxJ1: a cell marker for ciliated cells). Cell nuclei stained by DAPI in blue. Scale bars = 200 $\mu$ m. **D.** Representative H&E staining of lung sections at week 4 timepoint. No morphological changes observed in the alveolar area. The right images presented the lung tissue area indicated in the black box in the left images. Scale bars =5000 $\mu$ m and 500 $\mu$ m in the left and right side of images, respectively.

A

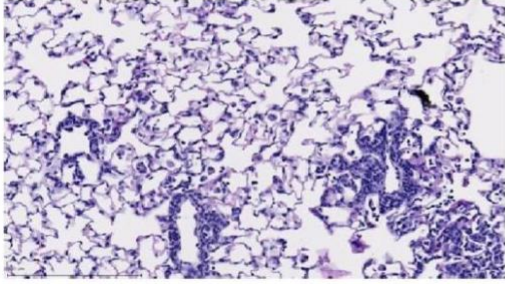

B

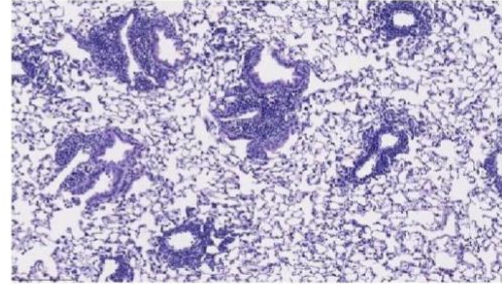

C

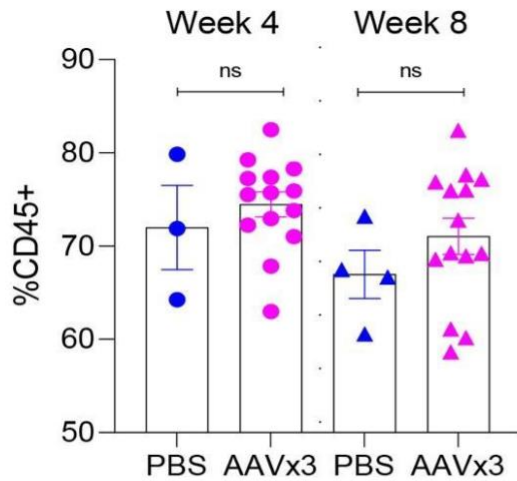

D

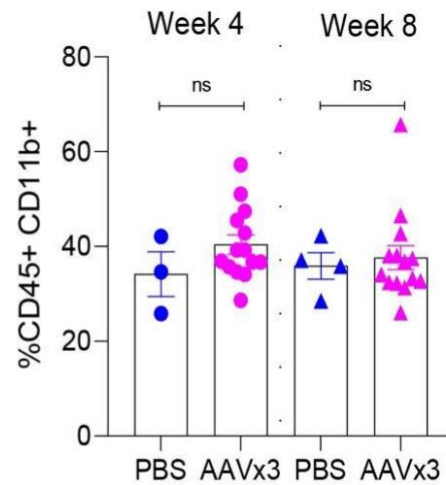

### Figure S8. Minimal host inflammatory response to AAV transduction.

**A.** Representative H&E staining of lung tissue showing free histiocytes within the alveoli. **B.** Representative H&E staining of lung tissue showing peribronchiolar inflammation. **C and D.** FACS analysis of dissociated lung cells from SpCas9 transgenic mice received three doses of AAV6-*Notch2*-sgRNApair-mCherry at 4e12vg/dose/mouse. Cells were stained with anti-CD45 (**C and D**) and anti-CD11b antibodies (**D**). Two timepoints were examined (Week 4 and week 8 post the 1<sup>st</sup> dosing of AAV). Each dot represents one animal. ns denotes not significant.

A

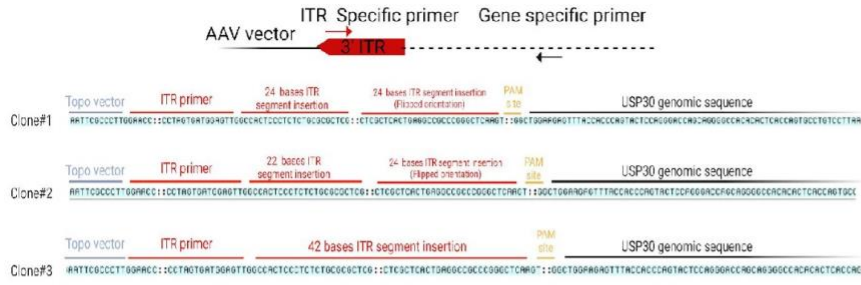

B

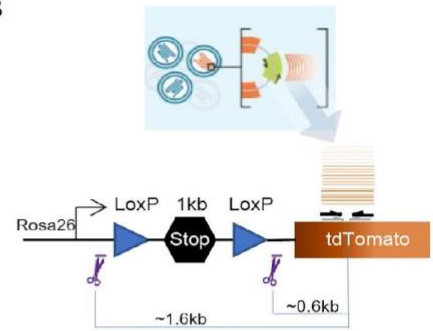

C

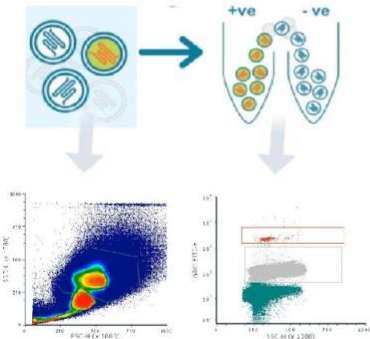

D

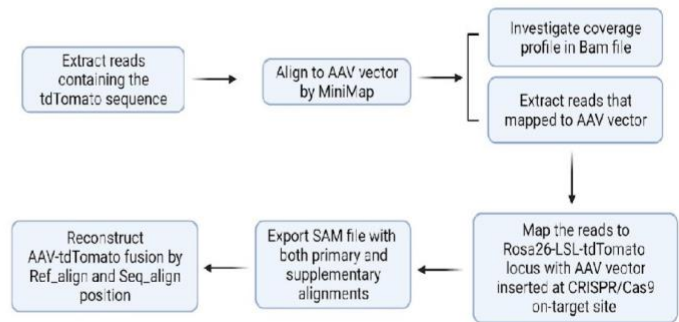

E

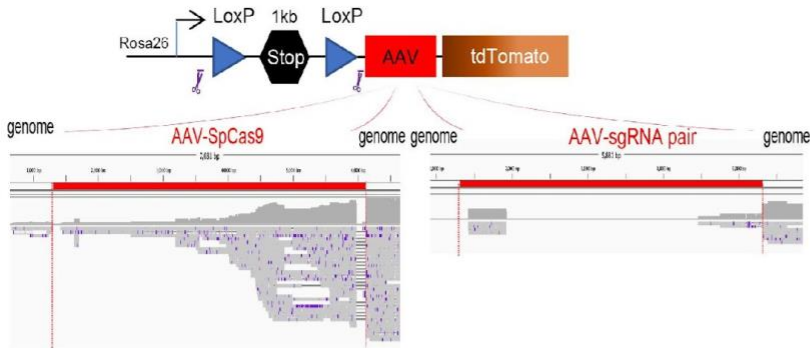

F

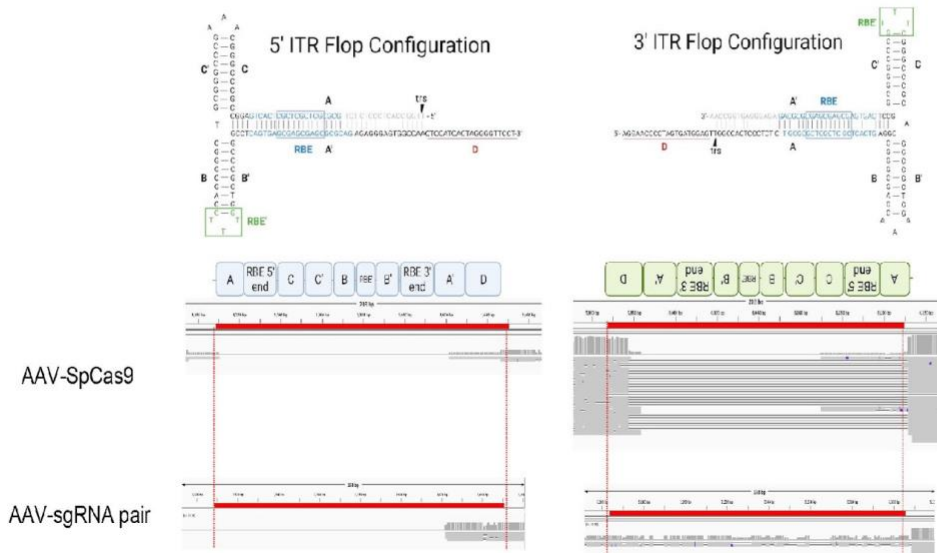

**Figure S9. Integration of AAV vector in CRISPR/SpCas9 on-target cut sites *in vitro* and *in vivo*.**

**A.** PCR analysis of AAV vector integration *in vitro*. MLE-12-SpCas9 cells were treated with AAV-sgRNA pair targeting *Usp30* at MOI = 1e5 vg and DNA was extracted at day 6 post transduction. Representative individual AAV ITR integration clones by TOPO cloning of the amplified PCR products were shown. The integrated ITR segments were underscored by red lines. The *Usp30* genomic sequence was underscored by black lines. The CRISPR/Cas9 PAM sites were underscored by orange lines. The Topo vector sequence was underscored by blue lines. **B.** Samplix Xdrop enrichment primer design. Upper panel: Samplix workflow step 3 - Identification of region of interest by target amplicon (~150bp, placed within the region of interest); lower panel: the PCR primers design for the generation and evaluation of the 150bp target amplicon. The genomic region of interest was outlined in the diagram. The detection and evaluation primer pairs were indicated by black and gray lines, respectively. Both primer pairs bind to the tdTomato genomic locus. The scissors icons represented the CRISPR/Cas9 on-target cut sites (LoxP sgRNA pair #1). The distance between the primer pairs and the LoxP sgRNA left and right on-target sites were shown. **C.** Samplix Xdrop enrichment sorting. Upper panel: Samplix workflow step 4-5, droplet staining and sorting on flow cytometer; Lower panel: Example of the gating setup for droplets. The positive droplet population was highlighted in red box. **D.** The workflow for identification of AAV integration in the genome of interest after Xdrop enrichment and ONT long read sequencing. **E.** IGV view of the sequence alignments to the reference genomic locus with AAV vector genome inserted in the on-target site targeted by the right-sgRNA of the sgRNA pair#1. The upper track showed the genetic composition of the reference genome. The scissors icons represent the CRISPR/Cas9 on-target cut sites; Lower track showed the IGV alignment. The AAV vector was underlined by a red line in the IGV. **F.** Zoomed-in IGV view of sequences aligned to the 5' and 3'- ITR regions in the AAV vector (same reference genome as shown in E). The drawings of 5' ITR and 3' ITR in the flop configuration were shown in the top panel. The regions in the ITR sequence were annotated, including the A/A' stem, B/B' arm, C/C' arm, D sequence (underlined in red color), the Rep-binding element (RBE) (in blue color) and the second Rep-binding element (RBE') (in green color). The blue box indicated the RBE core sequence. Arrowhead, terminal resolution site (trs). Gray letters: a region absent in vector ITR. The ITR sequence was indicated as a red line in the IGV view.

**Table S1. sgRNA sequences.**

| Target       | CRISPR/Cas9 system | sgRNA name        | Left sgRNA sequence (5' - 3') | Left PAM | Right sgRNA sequence (5' - 3') | Right PAM |
|--------------|--------------------|-------------------|-------------------------------|----------|--------------------------------|-----------|
| LSL cassette | SaCas9             | LoxP sgRNA pair#1 | TGCTATACGAAGTTATTCGCG         | ATGAAT   | TACGAAGTTATATTAAGGGTT          | CCGGAT    |
|              |                    | LoxP sgRNA pair#2 | TGCTATACGAAGTTATTCGCG         | ATGAAT   | CGACCTGCAGCCCAAGCTAGA          | TCGAAT    |
|              |                    | LoxP sgRNA pair#3 | TGCTGTCTCATCATTTTGCA          | AAGAAT   | TACGAAGTTATATTAAGGGTT          | CCGGAT    |
|              |                    | LoxP sgRNA pair#4 | TGCTGTCTCATCATTTTGCA          | AAGAAT   | CGACCTGCAGCCCAAGCTAGA          | TCGAAT    |
|              | SpCas9             | LoxP sgRNA pair#1 | TAGGAACTTCTTAGGGCCCG          | CGG      | TAGCTTGGGCTGCAGGTCTGA          | GGG       |
|              |                    | LoxP sgRNA pair#2 | AAAGAATTGATTTGATACCG          | CGG      | CAAGCTAGATCGAATTCGGC           | CGG       |
| Usp30        | SpCas9             | sgRNA pair#14     | GCTAAGTTCCCGGGCGCAGG          | CGG      | CCTGCCCTGCGTTTGTCAAG           | TGG       |
|              |                    | sgRNA pair#17     | CCGCCCGCCGCAGCGGAATG          | AGG      | GAAAACGCCTACCTCTCGTG           | TGG       |
|              |                    | sgRNA pair#22     | TGCGCACCGGGCGGCCGTC           | AGG      | ACACACGCGAGAGCGCGCTA           | AGG       |
| Notch2       | SpCas9             | sgRNA pair#3      | AAGATGACCCCATCGATCGA          | CGG      | TCACGTTATACTCGTCCAGG           | AGG       |
|              |                    | sgRNA pair#5      | CAGCATCAGCTCTCGAATAG          | CGG      | TCGCTTATGACACACTGACG           | GGG       |
|              |                    | sgRNA pair#41     | CCCAACCACAAGTGTCAGAA          | TGG      | CCGCCTTCCCTCCGGACAC            | AGG       |

**Table S2. PCR primer sequences.**

| Sequence ID                                                      | Sequence (5'- 3')         |
|------------------------------------------------------------------|---------------------------|
| Detection of genomic deletion in <i>Usp30</i> locus              |                           |
| sgRNA pair#14_F                                                  | AGCCTTTCCACATGAACCAA      |
| sgRNA pair#14_R                                                  | CAGACAGTAGATGAGAACCAACG   |
| sgRNA pair#17_F                                                  | GCAAATGCGAAGGCTCATAG      |
| sgRNA pair#17_R                                                  | TACCTGGTGTTACAGTGTTT      |
| Detection of genomic deletion in <i>Notch2</i> locus             |                           |
| sgRNA pair#5_F                                                   | GCTTCCCTACACTCTTCACATAG   |
| sgRNA pair#5_R                                                   | CCAGGCAAGTTCTGTCCTAAA     |
| sgRNA pair#41_F                                                  | CCCAACCTGCCATTTCTTCT      |
| sgRNA pair#41_R                                                  | GAGCTATCTTCTTCTAGTGGGTTTG |
| Detection of ITR- <i>Usp30</i> fusion events                     |                           |
| ITR primer_F                                                     | GGAACCCCTAGTGATGGAGTT     |
| <i>Usp30</i> primer_R                                            | GCGTGACACACAACAATA        |
| Samplix Xdrop Detection primers (generate 150bp target amplicon) |                           |
| WO100018_tdT_11F                                                 | GAAGGGCGAGATCCACCAG       |
| WO100018_tdT_11R                                                 | TCGTTGTGGGAGGTGATGTC      |
| Samplix Xdrop Evaluation primers                                 |                           |
| WO100018_tdT_10F                                                 | GATCCACCAGGCCCTGAAG       |
| WO100018_tdT_10R                                                 | CCAGCTTGGTGTCCACGTAG      |



**Table S3. Enrichment of DNA materials via Samplix Xdrop multiple displacement amplification in droplets (dMDA).**

| Sample                | PCR assay (detection primer pair) | Starting DNA amount (ng) | Positive droplets sorted | DNA amount post dMDA (ng) |
|-----------------------|-----------------------------------|--------------------------|--------------------------|---------------------------|
| Control               | WO100018_tdT_11                   | 10                       | 331                      | 696                       |
| AAV-SpCas9/sgRNA pair | WO100018_tdT_11                   | 10                       | 253                      | 432                       |

**Table S4. Statistics of ONT reads.**

| A                     | B           | C                                       | D                                                                                                     | E                                            | F                                                  | G                                            |
|-----------------------|-------------|-----------------------------------------|-------------------------------------------------------------------------------------------------------|----------------------------------------------|----------------------------------------------------|----------------------------------------------|
| Sample ID             | Total reads | % Mapped reads to mouse genome (GRCm39) | Number of reads containing 30bp sequence* in tdTomato locus, adjacent to where detection primers bind | Median mapped read length from column D (bp) | Number of reads from column D mapped to AAV vector | Median mapped read length from column F (bp) |
| Control               | 305391      | 99%                                     | 309                                                                                                   | 4078                                         | 0                                                  | N/A                                          |
| AAV-SpCas9/sgRNA pair | 230788      | 98.05%                                  | 326                                                                                                   | 4404                                         | 39                                                 | 4169                                         |

\*: 30bp sequence - CTCCACCGAGCGCCTGTACCCCCGCGACGG
